# Supplementary material
Source: Research Square preprint supplement (doi:10.21203/rs.3.rs-9409336/v1)
Supplement: Supplementary file 2 [file 6bc1c0bb2a7cd83e4fec2c7a.docx]

**Supporting information**

**High performance core-shell Fe2O3@N-C anode materials**

**derived from iron concentrate leachate for lithium ion batteries**

Yihao Penga,b,1, Yu Songa,b,1, Li Wangc, Hui Zhangd, Yin Lia,b,e*, Yaochun Yaoa,b

(a The National Engineering Laboratory for Vacuum Metallurgy, Kunming University of Science and Technology, Kunming 650093, Yunnan Province, China;

b Engineering Laboratory for Advanced Battery and Materials of Yunnan Province, Kunming University of Science and Technology, Kunming 650093, Yunnan Province, China;

c Hebei Normal University for Nationalities Chengde 067002, Hebei Province, China;

d Material and Architecture College, Guizhou Normal University, Guiyang 550025, China;

e Postdoctoral Programme of Shandong Humon Smelting Co. Ltd., Yantai 3264110, Shandong Province, China)

1 These authors contribute equally.


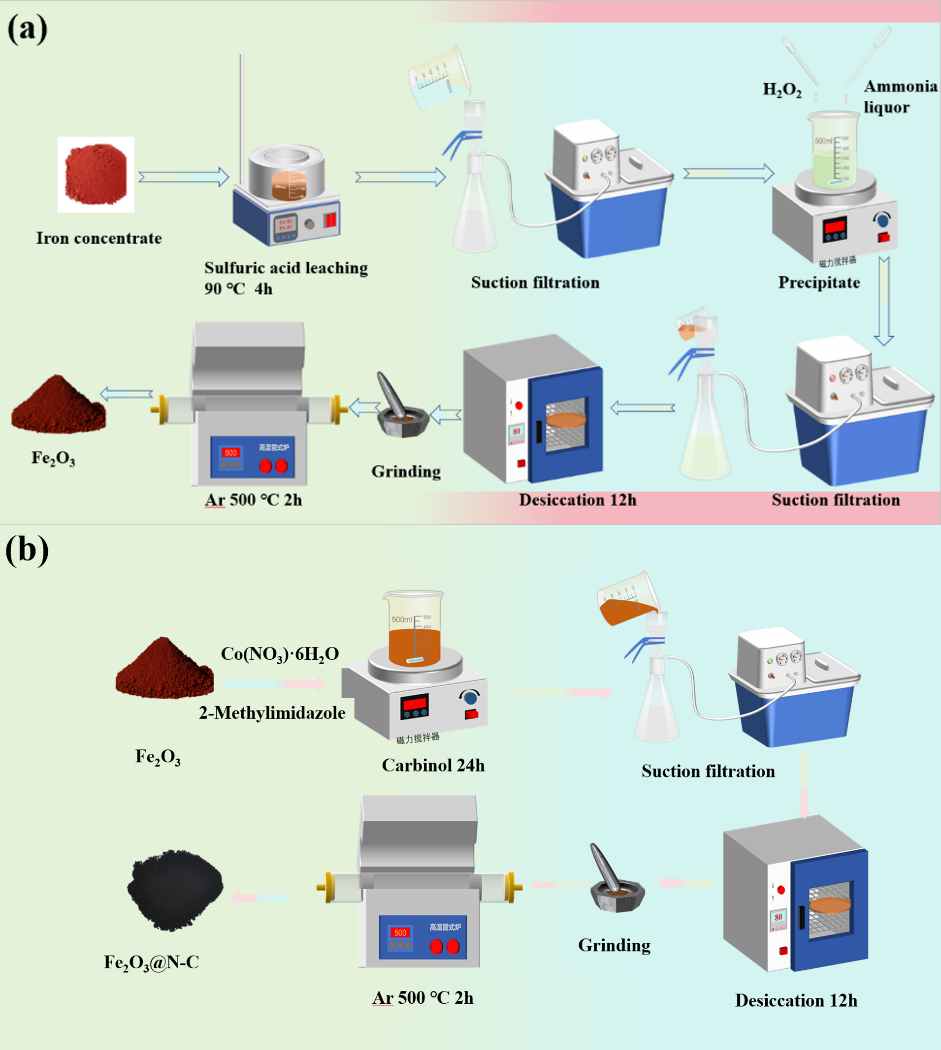


Fig. S1. (a) Flowchart of iron oxide preparation via iron ore concentrate leaching, and (b) the synthesis process of Fe2O3@N-C

Table S1 The main components of iron concentrate before and after leaching determined by ICP-OES.

| Solutions | Constituents and content | | | | | | | | | |
| --- | --- | --- | --- | --- | --- | --- | --- | --- | --- | --- |
| Al | Co | Cr | Mn | Ti | K | Na | Ca | Mg | Fe |
| Before leaching (wt. %) | 0.17 | 0.031 | 0.01 | 0.038 | 0.10 | 0.11 | 0.084 | 0.13 | 0.12 | 65.87 |
| After leaching (g/L) | 0.007 | 0.42 | 0.5 | 0.38 | 0.03 | 0.001 | 0.004 | 0.007 | 0.002 | 53.367 |


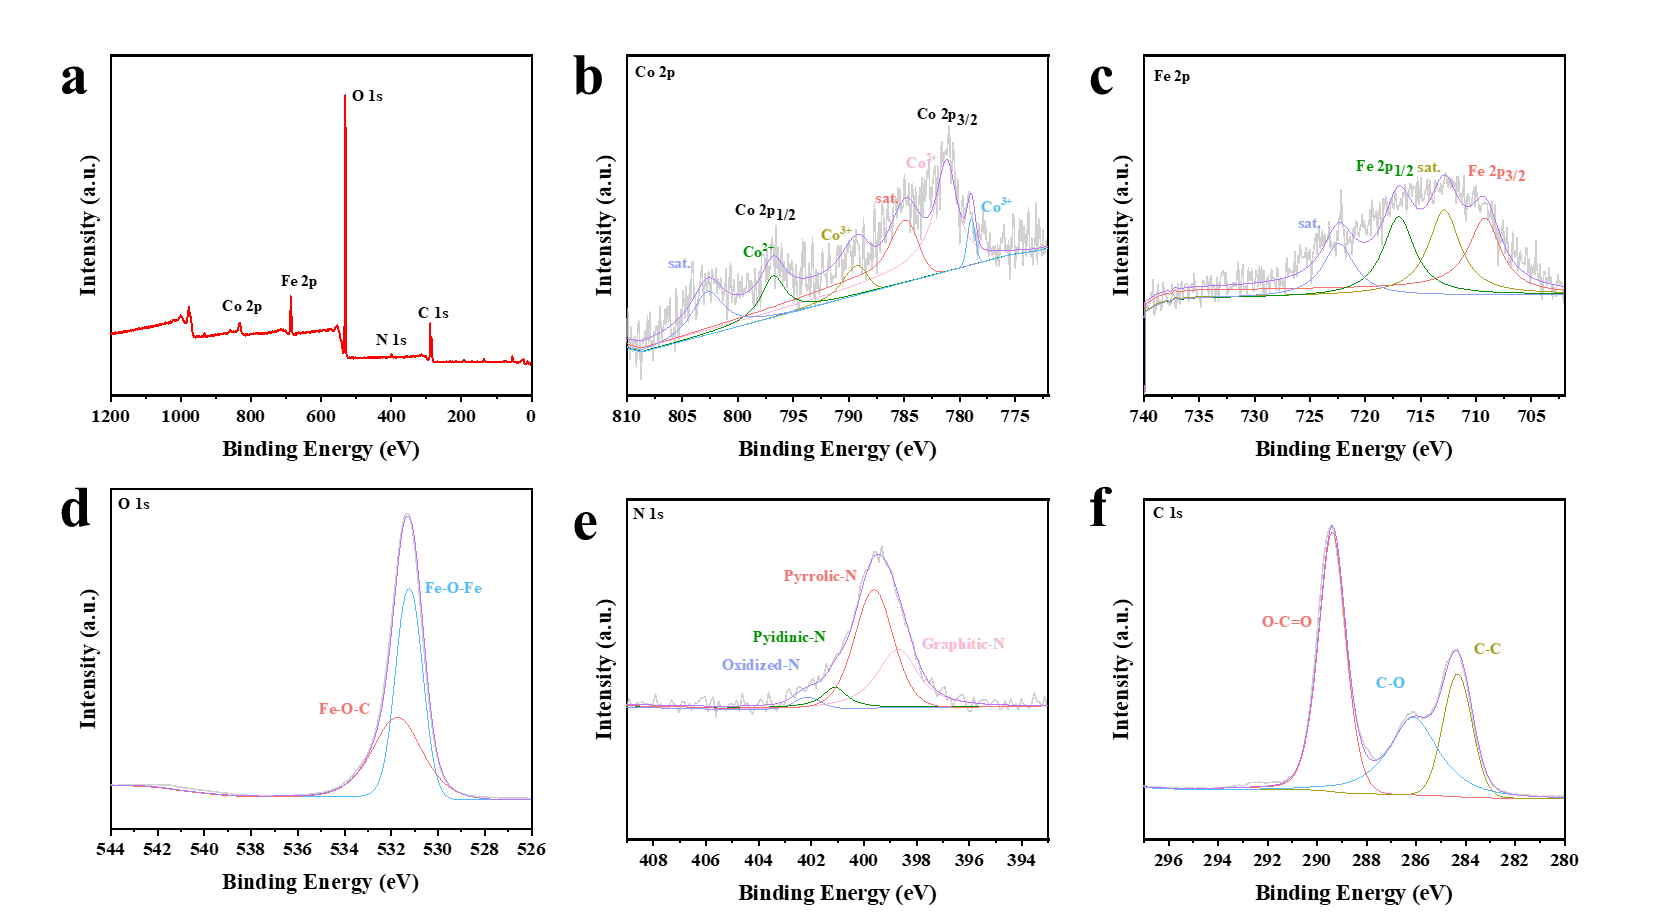


**Fig. S2.** XPS analysis of Fe2O3@N-C electrodes after 100 cycles at 1 A g-1 current density; (a) complete survey spectrum, (b) Co 2p, (c) Fe 2p, (d) O 1s, (e) N 1s and (f) C 1s.

To investigate the stability of Fe2O3@N-C electrodes, XPS analysis was performed after 100 cycles at 1 A g-1 (Fig. S2). The survey scan (Fig. S2a) confirms retention of all constituent elements (Fe, Co, N, O, C) with no observable elemental loss, indicating excellent structural stability. Detailed spectral analysis reveals: Co 2p spectrum (Fig. S2b) shows characteristic peaks at 779.96 eV (Co0), 781.20 eV (Co2+), and 784.93 eV (Co3+), with satellite peaks at 789.25 and 802.73 eV[S1]. The decreased peak intensities suggest partial material detachment due to volumetric expansion during cycling[S2]. Fe 2p spectrum (Fig. S2c) displays main peaks at 709.20 eV (Fe 2p3/2) and 716.98 eV (Fe 2p1/2), with satellite peaks at 712.86 and 722.40 eV, consistent with Fe3+ oxidation state. O 1s spectrum (Fig. S2d) exhibits two dominant peaks at 529.52 eV (Fe-O-Fe) and 531.32 eV (Fe-O-C), confirming maintained chemical bonding. N 1s spectrum (Fig. S2e) resolves four components: 398.64 eV (graphitic N), 399.62 eV (pyridinic N), 401.11 eV (pyrrolic N), and 402.13 eV (oxidized N), demonstrating nitrogen configuration stability[S3]. C 1s spectrum (Fig. S2 f) shows increased O-C=O peak intensity (289.38 eV) attributable to electrolyte decomposition (1M LiPF6 in EC/DMC/EMC 1:1:1 v/v), while maintaining C-C (284.32 eV) and C-O (286.1 eV) bonds[S4].

[S1] X. Wan, R. Wu, J. Deng, Y. Nie, S. Chen, W. Ding, X. Huang, Z. Wei, A metal–organic framework derived 3D hierarchical Co/N-doped carbon nanotube/nanoparticle composite as an active electrocatalyst for oxygen reduction in alkaline electrolyte†, Journal of Materials Chemistry A, (2018).

[S2] M. Wang, F. Xi, S. Li, W. Ma, X. Wan, Z. Tong, B. Luo, ZIF-67-derived porous nitrogen-doped carbon shell encapsulates photovoltaic silicon cutting waste as anode in high-performance lithium-ion batteries, Journal of Electroanalytical Chemistry, (2023).

[S3] D. Jin, X. Yang, Y. Ou, M. Rao, Y. Zhong, G. Zhou, D. Ye, Y. Qiu, Y. Wu, W. Li, Thermal pyrolysis of Si@ZIF-67 into Si@N-doped CNTs towards highly stable lithium storage, Science Bulletin, (2019).

[S4] K. Zhang, H. Mao, X. Gu, C. Song, J. Yang, Y. Qian, ZIF-Derived Cobalt-Containing N-Doped Carbon-Coated SiOx Nanoparticles for Superior Lithium Storage, ACS Applied Materials & Interfaces, (2020).

Based on GITT curves, the lithium ion diffusion coefficient (DLi+) can be estimated by the following formula [S6, S7]:

( τ＜＜L2/D) (Eq.S1)

where t is the duration time of the constant current pulse (S), mB, MB, and VM are the mass loading (g), molecular weight (g mol-1), molar volume (cm-3 mol-1) of the active material; S denotes the surface area of the electrode; ΔES and ΔEτ represent the change in the steady-state voltage at a plateau and the total change in cell voltage during pulse time, respectively. d the total change in cell

voltage during pulse time, respectively. Fig. S3b compares the DLi+ values during the 3rd and 4th cycles. It can be seen that the DLi+ values range from 10-12 to 10-9 cm2 s-1.


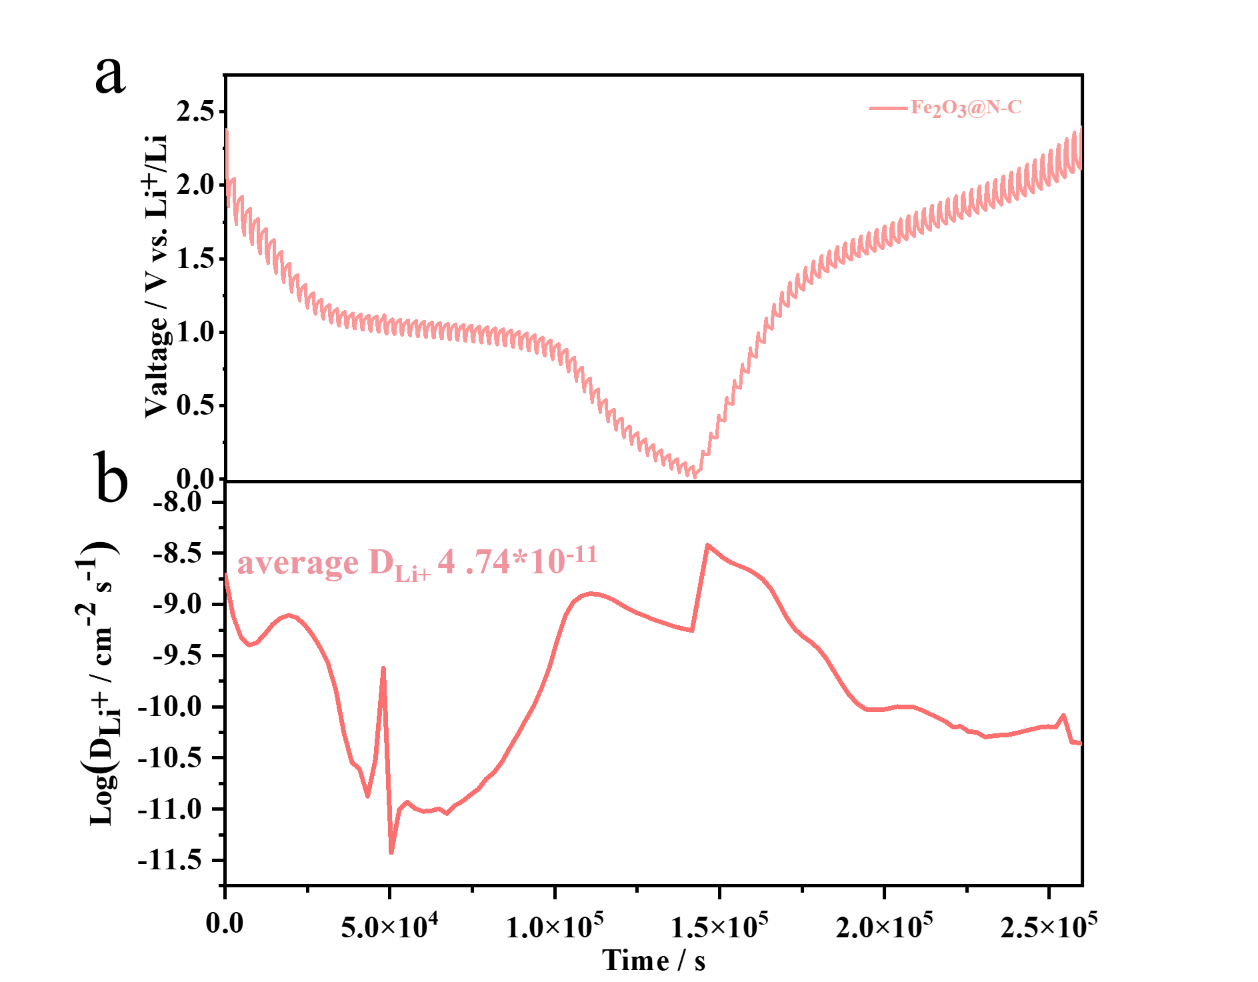


Fig. S3. (a) GITT curves and (b) the corresponding Li+ diffusion coefficients (DLi+) of the Fe2O3@N-C electrode

[S5] C. Hong, Q. Leng, J. Zhu, S. Zheng, H. He, Y. Li, R. Liu, J. Wan, Y. Yang, Revealing the correlation between structural evolution and Liþ diffusion kinetics of nickel-rich cathode materials in Li-ion batteries, J. Mater. Chem. 8 (2020) 8540-8547

[S6] X.H. Rui, N. Ding, J. Liu, C. Li, C.H. Chen, Analysis of the chemical diffusion coefficient of lithium ions in Li3V2(PO4)3 cathode material, Electrochim. Acta. 55 (2010) 2384-2390.
