# Supplementary material
Source: Research Square preprint supplement (doi:10.21203/rs.3.rs-9409336/v1)

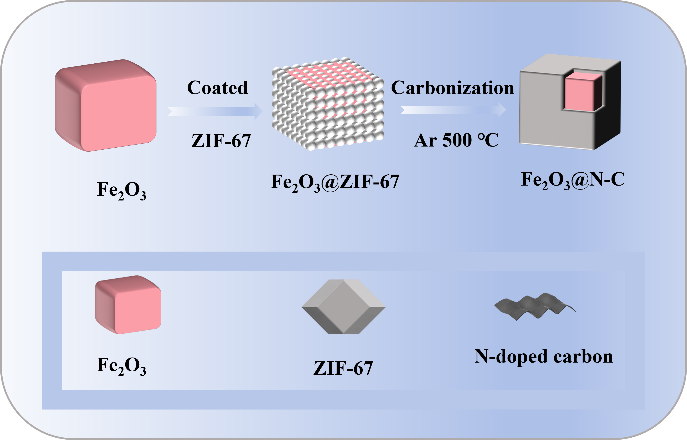


**Scheme. 1** Synthetic process of Fe2O3@N-C

Supplement: Supplementary file 1 [file 65fa39ece8daa037ca880f8f.docx]
